# Supplementary material
Source: publisher figshare collection journal article supplement (https://tandf.figshare.com/ndownloader/files/12805394)

Quality of ONSD measurement

Patient Number : **|__| |__|** Expert Number : ……………………

2D – Mode. ❑ yes ❑ No

Linear Probe 7,5 Mhz (Hight frequency) ❑ yes ❑ No

Use Vascular system ❑ yes ❑ No

Depth 4cm ❑ yes ❑ No

Positioning the probe : horizontal (transverse plane) ❑ yes ❑ No

0.3 cm from the retina, parallel to the longitudinal axis

of the NO ❑ yes ❑ No

Measurement in the perpendicular axis of NO ❑ yes ❑ No

Measurement of both eyes ❑ yes ❑ No

Mean ONSD measurement : ………….mm

Measurement validated ❑ Yes ❑ No
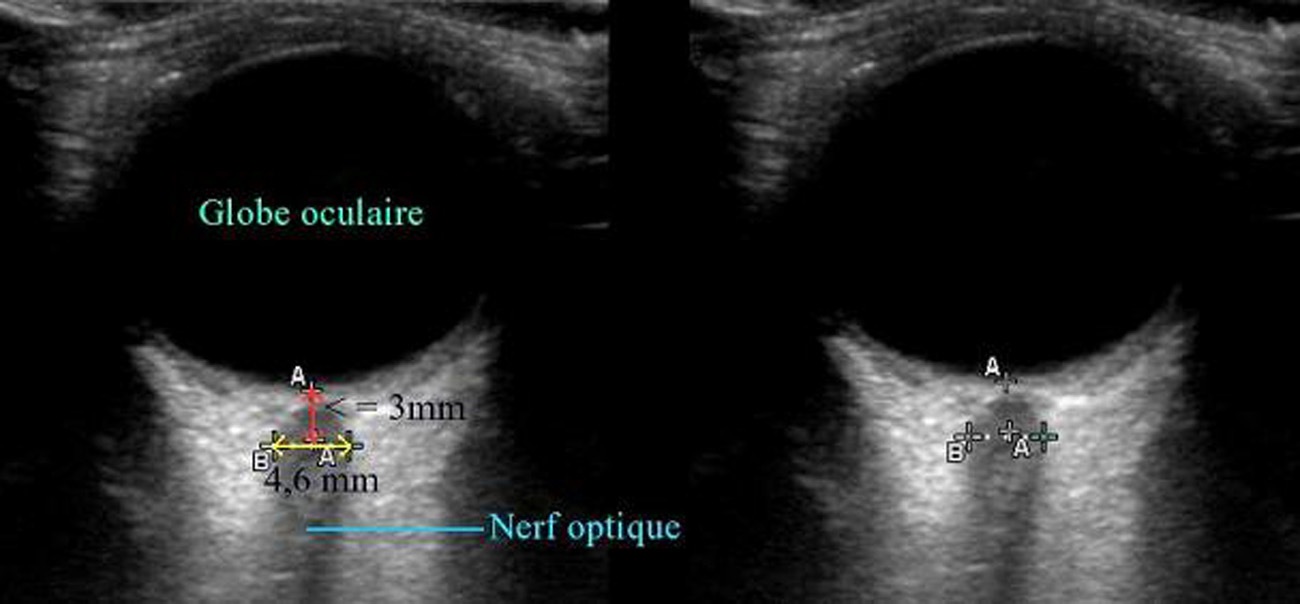

Supplement: Supplementary file 1 [file 12805394]
